# Supplementary material for: Proteinase-Activated Receptor 1 Inhibition Alleviates Intestinal Fibrosis in Mice with Chronic Colitis
Source: Research Square preprint supplement (doi:10.21203/rs.3.rs-3823707/v1), 2024-01-09
Supplement: Supplementary file 1 [file 1cf4ea99a64d6e9834c7d3e9.pdf]

Supplementary Table 2: Primer sequence

| <b>gene</b>                       | <b>primer sequence (5'→3')</b> |
|-----------------------------------|--------------------------------|
| <b>hVimentinF</b>                 | <b>GACGCCATCAACACCGAGTT</b>    |
| <b>hVimentinR</b>                 | <b>CTTTGTCGTTGGTTAGCTGGT</b>   |
| <b>hACTA2F</b>                    | <b>AAAAGACAGCTACGTGGGTGA</b>   |
| <b>hACTA2R</b>                    | <b>GCCATGTTCTATCGGGGTACTTC</b> |
| <b>hCol1<math>\alpha</math>1F</b> | <b>GAGGGCCAAGACGAAGACATC</b>   |
| <b>hCol1<math>\alpha</math>1R</b> | <b>CAGATCACGTCATCGCACAAAC</b>  |
| <b>hCol1<math>\alpha</math>2F</b> | <b>GTTGCTGCTTGCAGTAACCTT</b>   |
| <b>hCol1<math>\alpha</math>2R</b> | <b>AGGGCCAAGTCCAACCTCCTT</b>   |
| <b>hPAR1F</b>                     | <b>CGGCAGTGATTGGCAGTTTG</b>    |
| <b>hPAR1R</b>                     | <b>TGAGCAAGATAGAGGCGTACA</b>   |
| <b>mPAR1F</b>                     | <b>TGAACCCCGCTCATTCTTTC</b>    |
| <b>mPAR1R</b>                     | <b>CCAGCAGGACGCTTTCATTTT</b>   |
