# Supplementary material for: Proteinase-Activated Receptor 1 Inhibition Alleviates Intestinal Fibrosis in Mice with Chronic Colitis
Source: Research Square preprint supplement (doi:10.21203/rs.3.rs-3823707/v1), 2024-01-09
Supplement: Supplementary file 3 [file 48d4093044e19ceb0533fecb.pdf]

Supplementary Table 3: Criteria for Histologic Fibrosis Score of Intestine

|                     | Score | Description                                                                                                                     |
|---------------------|-------|---------------------------------------------------------------------------------------------------------------------------------|
| Fibrosis            | 0     | No increased collagen deposition                                                                                                |
|                     | 1     | Increased collagen deposition in submucosa                                                                                      |
|                     | 2     | Increased collagen deposition in submucosa and mucosa                                                                           |
|                     | 3     | Increased collagen deposition in muscularis mucosa, submucosa, and mucosa; thickening, disorganization of the muscularis mucosa |
|                     | 4     | Increased collagen deposition in muscularis propria, muscularis mucosa, submucosa, and mucosa                                   |
|                     | 5     | Increased collagen deposition throughout all layers including serosa                                                            |
| Percent involvement | 1     | 0–25% of section                                                                                                                |
|                     | 2     | 25–50% of section                                                                                                               |
|                     | 3     | 50–75% of section                                                                                                               |
|                     | 4     | 75–100% of section                                                                                                              |
