# Supplementary material for: Proteinase-Activated Receptor 1 Inhibition Alleviates Intestinal Fibrosis in Mice with Chronic Colitis
Source: Research Square preprint supplement (doi:10.21203/rs.3.rs-3823707/v1), 2024-01-09
Supplement: Supplementary file 4 [file 7c03cc39f705f40e15fd6760.pdf]

Supplementary Table 1: Patient characteristics of human samples

|                                            | <b>Control</b>      | <b>UC</b>            | <b>CD</b>           |
|--------------------------------------------|---------------------|----------------------|---------------------|
| <b>Mean age (year, range)</b>              | <b>45.67 ± 9.89</b> | <b>50.33 ± 8.92</b>  | <b>36.00 ± 6.53</b> |
| <b>Males</b>                               | <b>3 (50%)</b>      | <b>3 (50%)</b>       | <b>4 (66.67%)</b>   |
| <b>Mean disease duration (year, range)</b> | <b>0</b>            | <b>10.06 ± 12.78</b> | <b>2.71 ± 1.66</b>  |
| <b>Disease activity</b>                    |                     |                      |                     |
| <b>No</b>                                  | <b>6 (100%)</b>     | <b>-</b>             | <b>-</b>            |
| <b>Low</b>                                 | <b>-</b>            | <b>0 (0%)</b>        | <b>0 (0%)</b>       |
| <b>Moderate</b>                            | <b>-</b>            | <b>2 (33.33%)</b>    | <b>3 (50%)</b>      |
| <b>severe</b>                              | <b>-</b>            | <b>4 (66.67%)</b>    | <b>3 (50%)</b>      |

UC: ulcerative colitis; CD: Crohn's disease. Disease activity based on modified Mayo score and Crohn's Disease Activity Index. Data are expressed as mean ± SD.
