# Supplementary figures and images for: Proteinase-Activated Receptor 1 Inhibition Alleviates Intestinal Fibrosis in Mice with Chronic Colitis
Source: Research Square preprint supplement (doi:10.21203/rs.3.rs-3823707/v1), 2024-01-09

# Supplementary Figure

**A**

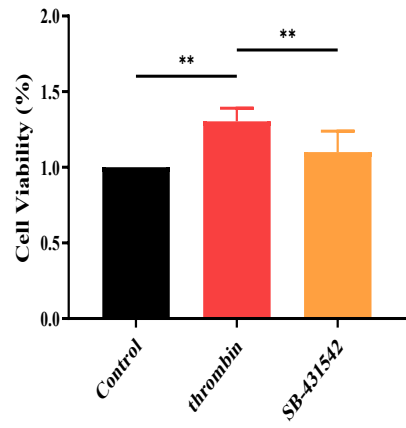

**B**

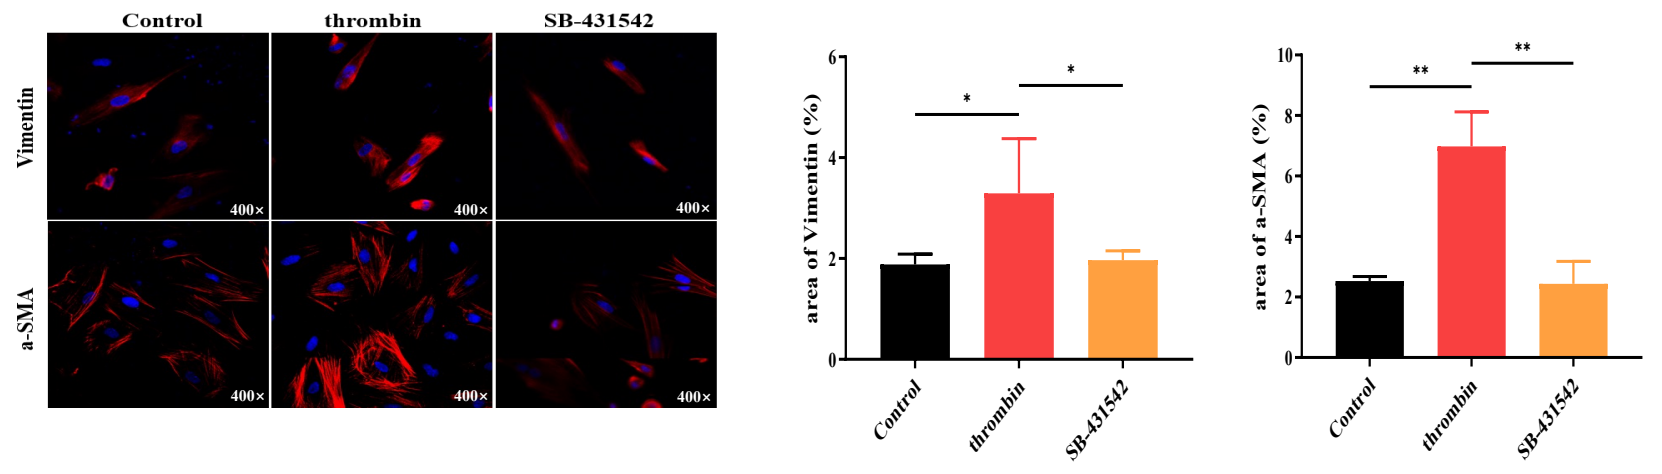

**C**

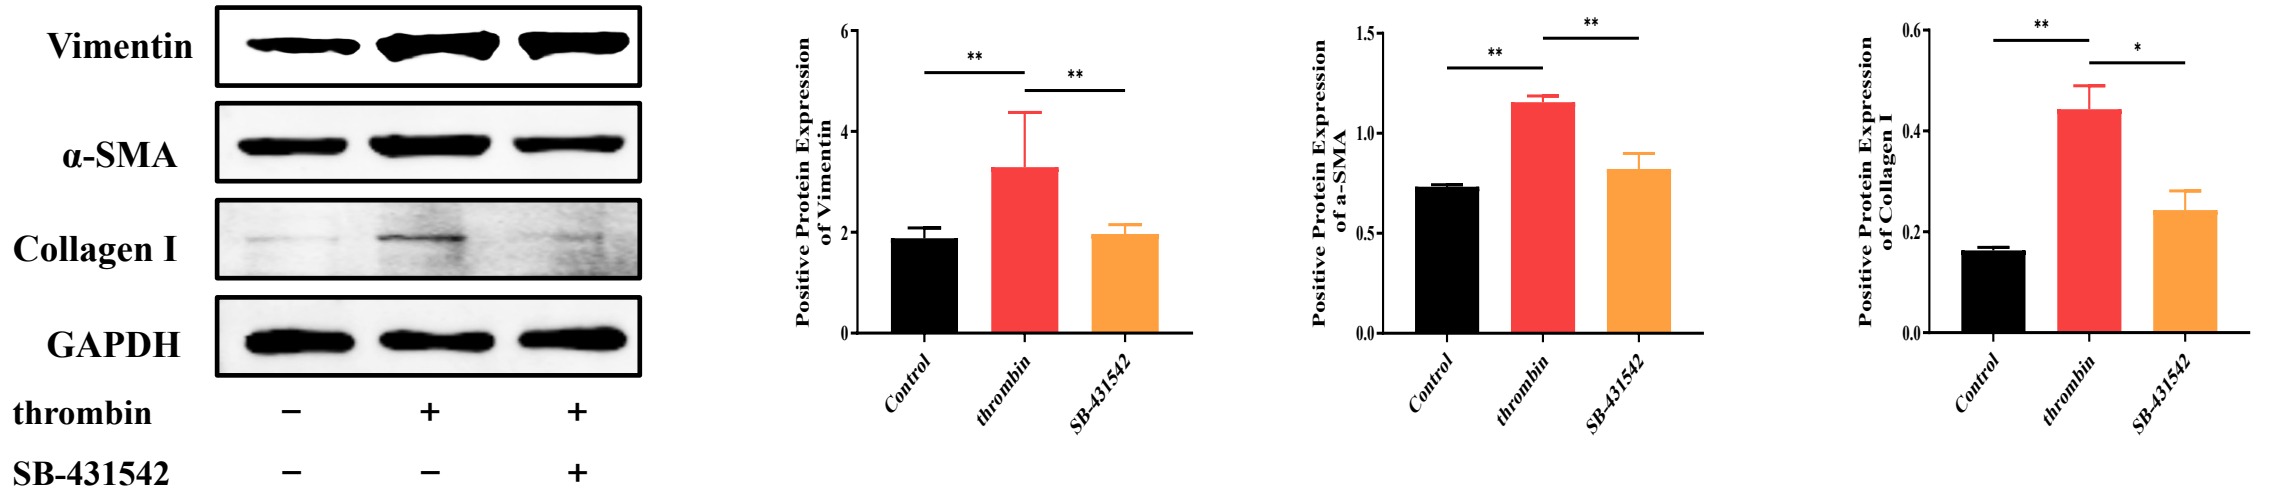

**D**

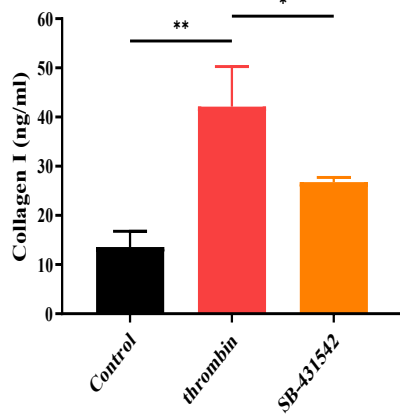

**E**

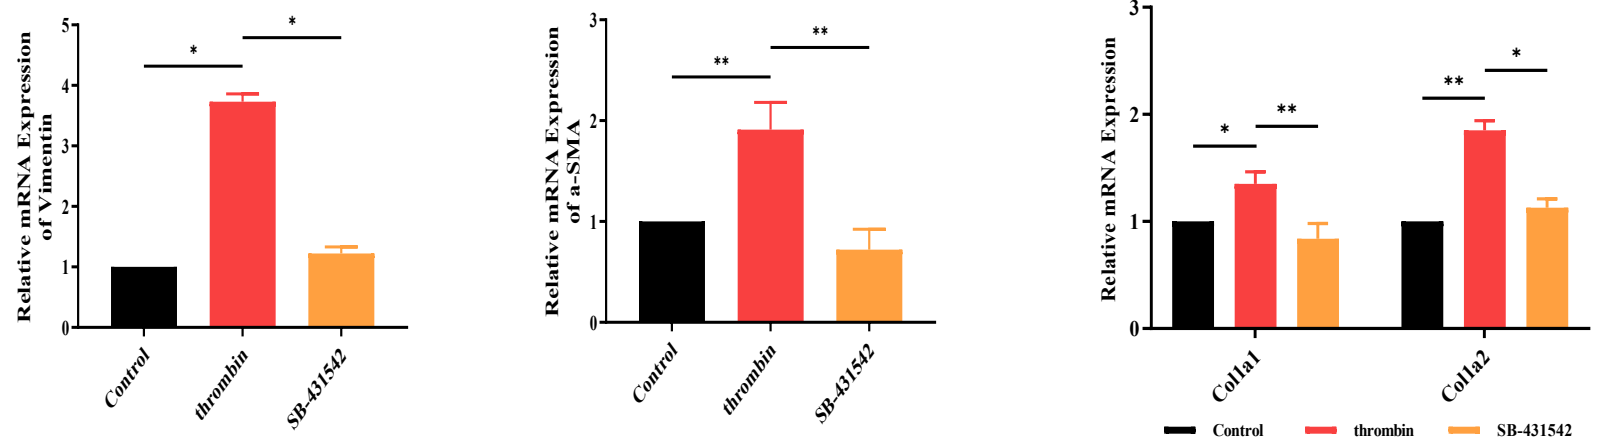

**F**

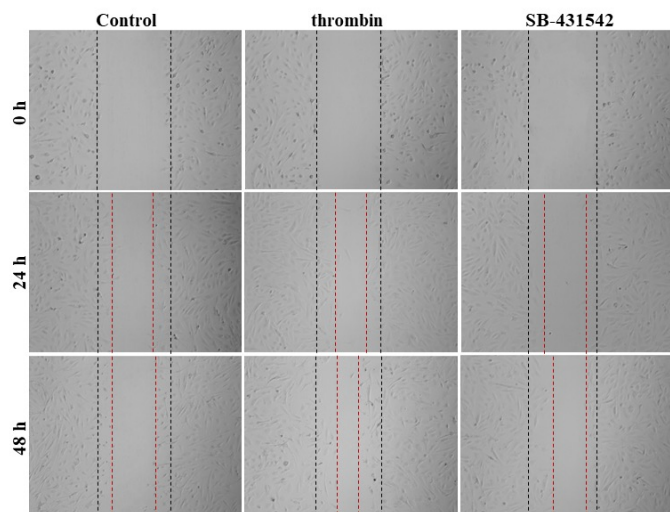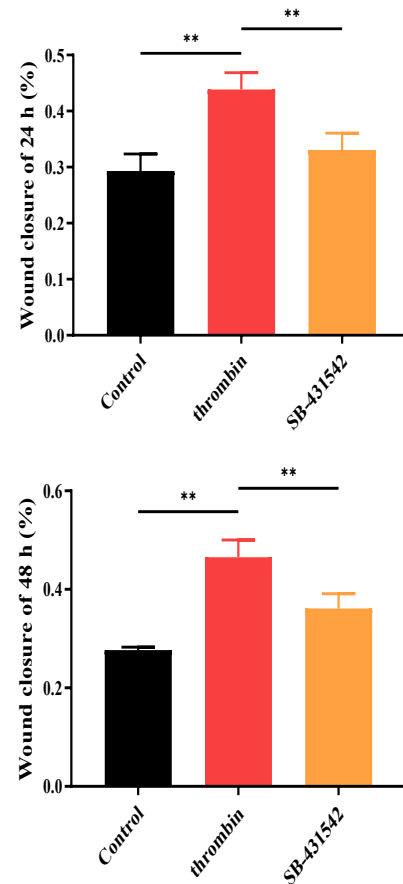

**G**

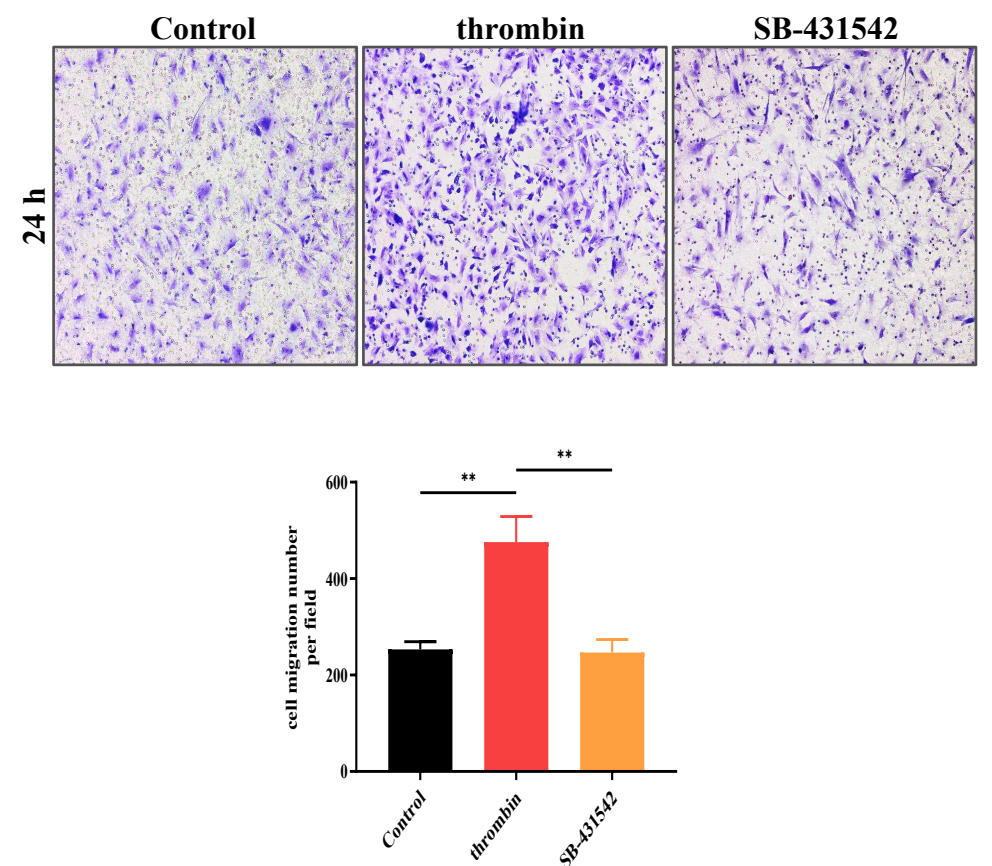

Supplement: Supplementary file 2 [file 47abb912756ab12d69c74649.pdf]
